# Supplementary material
Source: publisher site journal article supplement (https://www.dovepress.com/article/369702)
Supplement: Supplementary file 1 [file get_supplementary_file.php]

**Table S1. The top 10 genes in PPI network by 10 different algorithms**

| **Algorithm** | **Gene** |
| --- | --- |
| Maximal Clique Centrality (MCC) | Cmya5, **Cxcl1**, **Ddx58**, Il4ra, **Jak3**, Ldb3, Lep, Osm, Pgam2, Stat3 |
| Density of Maximum Neighborhood Component (DMNC) | Cebpb, Crlf2, **Ddx58**, Il4ra, **Jak3**, Lep, Osm, Pgam2, Tlr6, Xirp1 |
| Maximum Neighborhood Component (MNC) | Ankrd23, Cmya5, **Cxcl1**, Il4ra, **Jak3**, Ldb3, Lep, Osm, Pgam2, Stat3 |
| Degree | Cmya5, **Cxcl1**, **Ddx58**, Il4ra, **Jak3**, Ldb3, Lep, Mybpc3, Osm, Stat3 |
| Edge Percolated Component (EPC) | Cebpb, Crlf2, **Cxcl1**, **Ddx58**, Fut4, Il4ra, **Jak3**, Lep, Osm, Stat3 |
| BottleNeck | **Ddx58**, Fth1, Gclm, Irgm2, Ldb3, Myh11, Prickle1, Psmb9, Sorbs1, Stat3 |
| Eccentricity | Cyth4, **Ddx58**, Ifitm2, Irgm2, Oas3, Prickle1, Psmb8, Psmb9, Sorbs1, Tlr6 |
| Closeness | Cebpb, **Cxcl1**, **Ddx58**, Fut4, Il4ra, **Jak3**, Lep, Osm, Stat3, Tlr6 |
| Radiality | **Cxcl1**, **Ddx58**, Il4ra, Irgm2, Lep, Osm, Psmb8, Psmb9, Stat3, Tlr6 |
| Betweenness | **Cxcl1**, **Ddx58**, Irgm2, Ldb3, Myh11, Prickle1, Psmb8, Psmb9, Sorbs1, Stat3 |

**Notes**: Thefunctional methylated genes in each algorithm were marked red and the top 3 functional methylated genes were marked in bold red.

| **Samples** | **WT1** | **WT2** | **WT3** | **CS+WT1** | **CS+WT2** | **CS+WT3** |
| --- | --- | --- | --- | --- | --- | --- |
| Raw reads | 40821477 | 51821106 | 49288900 | 57887601 | 54259611 | 51926118 |
| Raw data(Gbp) | 12.25 | 15.55 | 14.79 | 17.37 | 16.28 | 15.58 |
| Clean reads | 40278134 | 51143717 | 48634653 | 56958891 | 53429175 | 51112294 |
| Mapped reads | 31878700 | 40400281 | 38644157 | 45876106 | 42339571 | 40530741 |
| Mapping rate(%) | 79.1 | 79.0 | 79.5 | 80.5 | 79.2 | 79.3 |
| Duplication rate(%) | 11.1 | 12.7 | 13.0 | 14.0 | 13.8 | 11.5 |
| Unique mapping rate(%) | 68.1 | 66.3 | 66.4 | 66.5 | 65.4 | 67.8 |
| Reads mapped to target | 54235856 | 68494300 | 65224593 | 78279328 | 72069875 | 68646875 |
| Capture rate(%) | 85.1 | 84.8 | 84.4 | 85.3 | 85.1 | 84.7 |
| Coverage of target | 61.6 | 77.6 | 74.1 | 89.0 | 81.9 | 78.3 |
| Median depth of target | 46 | 58 | 54 | 65 | 60 | 58 |
| %GC | 26.2 | 25.9 | 26.1 | 26.3 | 26.1 | 26.0 |

**Table S2. Summary of data production using liquid hybridization capture-based bisulfite sequencing**

**Table S3. GO and KEGG enrichment analyses**

| Term | P value | Count | Genes |
| --- | --- | --- | --- |
| interleukin-8 production | 0.00 | 6.00 | C5ar2, Ddx58, Hyal2, Lep, Stat3, Tlr6 |
| regulation of interleukin-8 production | 0.00 | 6.00 | C5ar2, Ddx58, Hyal2, Lep, Stat3, Tlr6 |
| production of molecular mediator involved in inflammatory response | 0.00 | 6.00 | Il4ra, Lep, Pdcd4, Rpl3, Stat3, Tlr6 |
| cytokine production involved in inflammatory response | 0.00 | 5.00 | Lep, Pdcd4, Rpl3, Stat3, Tlr6 |
| regulation of cytokine production involved in inflammatory response | 0.00 | 5.00 | Lep, Pdcd4, Rpl3, Stat3, Tlr6 |
| positive regulation of inflammatory response | 0.00 | 7.00 | Cebpb, Hyal2, Mdk, Osm, Pdcd4, Tlr6, Tnip1 |
| interleukin-6 production | 0.00 | 7.00 | C5ar2, Cebpb, Ddx58, Hyal2, Lep, Stat3, Tlr6 |
| regulation of interleukin-6 production | 0.00 | 7.00 | C5ar2, Cebpb, Ddx58, Hyal2, Lep, Stat3, Tlr6 |
| MyD88-dependent toll-like receptor signaling pathway | 0.00 | 3.00 | Cd300lf, Tlr6, Tnip1 |
| positive regulation of interleukin-6 production | 0.00 | 5.00 | Ddx58, Hyal2, Lep, Stat3, Tlr6 |
| interleukin-12 production | 0.00 | 4.00 | Jak3, Lep, Mdk, Tlr6 |
| regulation of interleukin-12 production | 0.00 | 4.00 | Jak3, Lep, Mdk, Tlr6 |
| negative regulation of adaptive immune response | 0.00 | 4.00 | Fcgr2b, Il4ra, Jak3, Samsn1 |
| positive regulation of interleukin-8 production | 0.00 | 4.00 | Ddx58, Hyal2, Lep, Stat3 |
| positive regulation of stem cell proliferation | 0.00 | 3.00 | Cxcl1, Epcam, Tbx3 |
| cellular response to interleukin-4 | 0.00 | 3.00 | Cd300lf, Jak3, Rpl3 |
| response to interleukin-4 | 0.00 | 3.00 | Cd300lf, Jak3, Rpl3 |
| stem cell proliferation | 0.00 | 4.00 | Cxcl1, Epcam, Nkap, Tbx3 |
| positive regulation of reactive oxygen species metabolic process | 0.00 | 4.00 | Cxcl1, Lep, Rpl3, Tlr6 |
| mast cell activation | 0.00 | 4.00 | Cd300lf, Crlf2, Fcgr2b, Il4ra |
| cellular response to virus | 0.01 | 3.00 | Ddx58, Irgm2, Oas3 |
| regulation of alpha-beta T cell differentiation | 0.01 | 3.00 | Il4ra, Jak3, Nkap |
| glutathione metabolic process | 0.01 | 3.00 | Gclm, Gsr, Gstz1 |
| CD4-positive, alpha-beta T cell differentiation involved in immune response | 0.01 | 3.00 | Il4ra, Jak3, Stat3 |
| alpha-beta T cell differentiation involved in immune response | 0.01 | 3.00 | Il4ra, Jak3, Stat3 |

**Note:** The functional methylated genes in each term were marked red.
